# Supplementary material
Source: PubMed Central journal article supplement (PMC2951713)
Supplement: 97320630004263S1.pdf [file 97320630004263S1.pdf]

**Supplementary material****Raw material supplier Industries in India**

A Indian Neem Tree Company  
Aatish Industries  
AayurMed Biotech Pvt. Ltd.  
Advance chemical processor (L)  
Agya Enterprises, Bhopal  
Alchemy Chemicals  
Amruta Herbals Private Limited  
Ansar Industries  
Apex International  
Apollo Herbal Export  
Archana Exports  
Arun India Exports  
Athulya Exports  
Atlas Industries  
Aum Agri Freeze Foods  
Aushdhi  
Balaji Global Impex  
Best Exports  
Bhoomi Nutraceuticals Pvt. Ltd  
Biosourcing.com (p) ltd  
Boom Buying Pvt. Ltd.  
Cherain chemicals  
Clarion Pharmaceutical Co.  
Cymbio Pharma Pvt Ltd.  
Dabur India Ltd.  
Deepak Trading Company, Bangalore  
Digvijaypharma Industries  
Disha consultancy services  
Divya International  
Ecotech Technologies (I) Private Limited  
Exports & Agencies  
Fairy Food Products Pvt. Ltd.  
Farmawealth Bio-Tech  
Floral Seed Company  
G. Mohanraj  
Geet Herbal Farms and Essential Oils  
Green Earth Products  
Grover Sons  
H. Bilal & Co.  
Herbal avenue  
Herbex Laboratories  
Herbs India, Tuticorin  
Indo World Trading Corporation  
Ishita Health Care  
K. Mohamed & Company  
K. Patel Phyto Extractions Pvt. Ltd.  
Kapoor herbal products  
Karnataka Aromas, Bangalore  
Kashmir Honey Trading Co.  
Khandige Herbs and Plantations Pvt Ltd  
Kumaon Chemical Products  
Lala Jagdish Prasad & Co.  
Leela Industries  
Maharaja Dehydration Pvt. Ltd.  
Malhar Enterprise  
Manilal Jamnadas  
Megha Products  
Modiorchards Limited  
Mother Herbs [P] Ltd.  
M.S.S. Asan Expots  
Multibiz Natural Products  
Natraj Exports  
Nav Bharat Trading Company  
Navshakti Herbal Labs  
Nivas Impex  
Omkrown Pharma Chem Pvt. Ltd.  
Omshakthi Exports  
Packiam Botanicals  
Padmavati Agro Overseas  
Pas Kosmosis Agro Pvt. Ltd.  
Perennial Biotechs Pvt Limited  
Phyto Concentrates  
Phyto Organics Pvt Ltd  
Pioneer Enterprise  
Pradhan International  
Prakruti Products  
Prakruti Products Pvt. Ltd.  
Protek India  
P.S.S.J. Suthanthira Enterprise  
Quest Marketing Company  
R. S. V. Nadar & Co.  
Raj and group  
Ras Agro Associates  
Ratanjot Green Fuels Private Limited  
Rampal  
Rohit Marketing  
Ruchi Biochemicals  
S. D. Biotech  
S. & H. Industries  
S. J. Herbals and Health Care  
S. S. Herbals  
Sai Phytoceuticals Pvt. Ltd.  
Sanjeevani Herbals  
Sanjivini Herbals  
Santosa Impex  
Scat Herbal Pvt. Ltd.  
Scion Agri  
Sharda Enterprises, Bikaner  
Shimla Hills Offerings Pvt. Ltd  
Shree Shyam Manohar Isabgol Industries Pvt. Ltd.  
Shubhmets  
Silverline Chemicals  
Sip india exports  
Siris Impex  
Sitaram & Co.  
Southern India Spices Essences  
Stevia Biotech Pvt. Ltd  
Surajbala Exports Private Limited  
The Gwalior Forest Products Limited  
The Stevia Agro India  
The Universal Good Life Centre, Coimbatore  
Tulsi Amrit Pvt. Ltd.  
Unico Pharmaceuticals  
Vaasanthi Herbal  
Vaghasia Exports Pvt. Ltd  
Vanashree Agrotech  
Varushapriya Agrotech Pvt. Ltd  
Vedantika Herbals (NCL Agro Foods)  
Venkatesh Food Industries  
Vignesh Exports  
Vishal Organix  
VPS Agro Oils Private Limited  
Wingz Inc.

## List of Antidiabetic Medicinal Plants in Alphabetical order:

### A

*Abelmoschus moschatus*  
*Abroma augusta*  
*Acacia arabica*  
*Acacia catechu*  
*Acanthopanax senticosus*  
*Achillea santolina*  
*Achyranthes aspera*  
*Achyrocline satureioides*  
*Acosmium panamense*  
*Aegle marmelose*  
*Agaricus bisporus*  
*Agrimony eupatoria*  
*Ajuga iva*  
*Allium cepa*  
*Allium sativum*  
*Aloe barbadensis*  
*Anacardium occidentale*  
*Andrographis paniculata*  
*Anemarrhen asphodeloides*  
*Angylocalyx pynaertii*  
*Annona squamosa*  
*Arctium lappa*  
*Areca catechu*  
*Arfazetin*  
*Artemisia herba alba*  
*Artemisia dracunculus*  
*Artemisia sphaerocephala*  
*Krasch Astragalus membranaceus*  
*Averrhoa bilimbi*  
*Linn Azadirachta indica*  
*Azorella compacta*

### B

*Bacopa monniera*  
*Bauhinia candicans*  
*Bauhinia forficata*  
*Beta vulgaris*  
*Borhaavia diffusa*  
*Bidens pilosa*  
*Biophytum sensitivum*  
*Bixa orellana*  
*Brassica juncea*  
*Bryonia alba*  
*Bumelia sartorum*

### C

*Caesalpinia bonducella*  
*Cajanus cajan*  
*Camellia sinensis*  
*Capparis spinosa*  
*Capsicum frutescens*  
*Carum carvi*  
*Casearia esculenta*  
*Cassia auriculata*  
*Cassia fistula*  
*Catharanthus roseus*  
*Cecropia obtusifolia*  
*Chamaemelum nobile*  
*Chelidonium majus*  
*Cichorium intybus*  
*Cimicifuga dahurica*  
*Cinnamomum cassia*  
*Cinnamomum zeylanicum*  
*Cirsium pascuarens*  
*Cissus sicyoides*  
*Citrullus colocynthis*  
*Clausena anisata*  
*Clerodendron phlomoides*  
*Coccinia indica*  
*Cogniauxia podoleana*  
*baillon Commelina communis*  
*Coriandrum sativum*  
*Cornus officinalis*

*Croton cajucara*  
*Cryptolepis sanguinolenta*  
*Cucurbita ficifolia*  
*Cuminum cyminum*  
*Cuminum nigrum*  
*Curcuma longa*  
*Cyamopsis tetragonolobus*  
*Cynodon dactylon*

### D

*Dioscorea dumetorum*

### E

*Eclipta alba*  
*Emblica officinalis*  
*Ephedra distachya*  
*Enicostemma littorale*  
*Equisetum myriochaetum*  
*Erigeron breviscapus*  
*Eriobotrya japonica*  
*Eucalyptus globules*  
*Euphrasia officinale*

### F

*Ficus bengalensis*  
*Ficus carica*  
*Ficus glomerata*  
*Filipendula ulmaria*  
*Fraxinus excelsior*

### G

*Garcinia kola*  
*Gentiana olivieri*  
*Ginkgo biloba*  
*Globularia alypum*  
*Glycine max*  
*Glycyrrhiza glabra*  
*Glycyrrhizae radix*  
*Glycyrrhiza uralensis*  
*Gongronema latifolium*  
*Gymnema montanum*  
*Gymna sylvestre*

### H

*Harpagophytum procumbens*  
*Helicteres isora*  
*Hintonia latiflora*  
*Hintonia standleyana*  
*Hordeum vulgare*  
*Hydrastis Canadensis*  
*Hypoxis hemerocallidea*

### I

*Ibervillea sonora*  
*Inula racemosa*  
*Ipomoea aquatica*

### J

*Jatropha curcas*  
*Juniperus communis*

### K

*Kalopanax pictus*

### L

*Larrea tridentate*  
*Lagerstroemia speciosa*  
*Leguminous*  
*Lepechinia caulescens*  
*Lepidium sativum*  
*Linum usitatissimum*  
*Loranthus begwensis*  
*Luffa aegyptiaca*  
*Lupinus albus*

### M

*Mangifera indica*  
*Medicago sativa*  
*Mentha piperitae*  
*Momordica charantia*  
*Morinda lucida*  
*Benth Moringa oleifera*  
*Morus alba*  
*Morus indica*  
*Morus insignis*  
*Morus nigra*  
*Mucuna pruriens*  
*Murraya koenigii*

*Musa sapientum*  
*Myrcia uniflora*  
*Myrtus communis*

### N

*Nelumbo nucifera*  
*Nigella sativa*

### O

*Oceimum canum*  
*Ocimum gratissimum*  
*Oceimum sanctum*  
*Olea europaea*  
*Opuntia megacantha*  
*Opuntia robusta*  
*Origanum vulgare*  
*Otholobium pubescens*

### P

*Paeonia lactiflora*  
*Panax ginseng*  
*Panax quinquefolius*  
*L Pandanus odoratus*  
*Pantoea agglomerans*  
*Parmentiera edulis*  
*Peganum harmala*  
*Phaseolus vulgaris*  
*Phellinus baumii*  
*Phyllanthus amarus*  
*Phyllanthus sellowianus*  
*Picrorrhiza kurroa*  
*Piper sarmentosum*  
*Pistacia atlantica*  
*Polygala senega*  
*Polygonatum officinale*  
*Premna integrifolia*  
*Prunus davidiana*  
*Psacalium decompositum*  
*Psacalium peltatum*  
*Psidium guajava*  
*Psoralea corylifolia*  
*Pterocarpus marsupium*  
*Pueraria lobata*  
*Pueraria thunbergiana*  
*Punica granatum*

### Q

*Quercus infectoria*

### R

*Retama raetama*  
*Rhazya stricta*  
*Rhizophora apiculata*  
*Rubus fruticosus*  
*Rubus ulmifolius*

### S

*Salacia oblonga*  
*Salacia reticulata*  
*Salvia coccinia*  
*Salvia lavandulifolia*  
*Salvia officinalis*  
*Sambucus nigra*  
*Sanguis draxonis*  
*Saussurea lappa*  
*Sclerocarya birrea*  
*Scoparia dulcis*  
*Scrophularia deserti*  
*Securigera securidaca*  
*Sesamum indicum*  
*Sesbenia aegyptiaca*  
*Silybum marianum*  
*Smalanthus sonchifolius*  
*Solanum lycocarpum*  
*Spergularia purpurea*  
*Stevia rebaudiana*  
*Bertoni Strychnos nux vomica*  
*Suaeda fruticosa*  
*Sutherlandia frutescens*  
*Swertia chirayita*  
*Syzigium alternifolium*  
*Syzigium cordatum*  
*Syzigium cumini*

### T

*Tamarindus indica*  
*Taraxacum officinale*  
*Telfaria occidentalis*  
*Tephrosia purpurea*  
*Terminalia bellirica*  
*Terminalia chebula*

*Tetrapleura tetraptera* *Teucrium*  
*polium* *Thunbergia laurifolia* Linn  
*Tinospora cordifolia* *Tournefortia*  
*hirsutissima*  
*Tragia involucrate*  
*Tribulus terrestris* *Trichosanthes*  
*anguina* *Trichosanthes cucumerina*  
*Trichosanthes kirilowii* *Trigonella*  
*foenumgraecum* *Triticum vulgare*

*Turnera diffusa*  
**U**  
*Urtica dioica*  
**V**  
*Vaccinum myrtillus* *Verbesina*  
*crocata* *Verbesina persicifolia*  
*Viburnum foetens*  
**W**  
*Withania somnifera*

**X**  
*Xanthocercis zambesiaca*  
**Y**  
Not Available  
**Z**  
*Zingiber officinale* *Zizyphus sativa*  
*Zizyphus spina-christi*  
*Zygophyllum gaetulum*
